# Supplementary material for: One-step hydrothermal synthesis of photoluminescent carbon nitride dots derived from ionic liquids
Source: Royal Society of Chemistry journal article supplement (doi:10.1039/c5nj01717c), 2015-10-23
Supplement: c5nj01717c1.pdf [file c5nj01717c1.pdf]

## Electronic Supplementary Material

### One-Step Hydrothermal Synthesis of Photoluminescent Carbon Nitride Dots Derived from Ionic Liquid

Deli Xiao,<sup>a</sup> Siqiao Li,<sup>a</sup> Shubo Liu,<sup>a</sup> Hua He<sup>\*ab</sup> and Jinrong Lu<sup>c</sup>

<sup>1</sup> Department of Analytical Chemistry, China Pharmaceutical University, Nanjing 210009, China

<sup>2</sup> Key Laboratory of Drug Quality Control and Pharmacovigilance, Ministry of Education, China Pharmaceutical University, Nanjing 210009, China

<sup>3</sup> Department of Organic Chemistry, China Pharmaceutical University, Nanjing 210009, China

\* To whom correspondence should be addressed. Phone/Fax: (+86)-025-83271505; fax: +86 025 83271505. E-mail: dochehua@163.com, jcb315@163.com

Table S1 Condition optimization for the preparation of CNDs

| No. of CNDs | The amount of ion liquid (g) | The volume of water (mL) | T(°C) | Time(h) | Quantum yield (%) |
|-------------|------------------------------|--------------------------|-------|---------|-------------------|
| 1           | 0.5                          | 20                       | 100   | 12      | 0.00              |
| 2           | 0.5                          | 20                       | 160   | 12      | 3.81              |
| 3           | 0.5                          | 20                       | 200   | 6       | 6.37              |
| 4           | 0.5                          | 20                       | 200   | 24      | 8.29              |
| 5           | 0.25                         | 20                       | 200   | 12      | 7.67              |
| 6           | 0.75                         | 20                       | 200   | 12      | 8.16              |
| 7           | 0.5                          | 10                       | 200   | 12      | 4.69              |
| 8           | 0.5                          | 15                       | 200   | 12      | 7.52              |
| 9           | 0.5                          | 20                       | 200   | 12      | 8.34              |

Table S2. The quantum yields of CNDs.

| Substance | Integrated emission | Abs. at 355 nm | Refractive index | Quantum yield of |
|-----------|---------------------|----------------|------------------|------------------|
|-----------|---------------------|----------------|------------------|------------------|

|                 | intensity ( <i>I</i> ) |       |      | solvent ( $\eta$ ) |
|-----------------|------------------------|-------|------|--------------------|
| Quinine sulfate | 51424.233              | 0.006 | 1.33 | 0.54 (known)       |
| CNDs            | 59581.938              | 0.045 | 1.33 | 0.0834             |

Table S3. Elemental analysis of [Bmim]BF<sub>4</sub> and CNDs

| Sample                             | Element Contents |       |      |
|------------------------------------|------------------|-------|------|
|                                    | %C               | %N    | %H   |
| [Bmim]BF <sub>4</sub> (calculated) | 42.47            | 12.39 | 6.64 |
| CNDs                               | 48.97            | 8.56  | 5.72 |

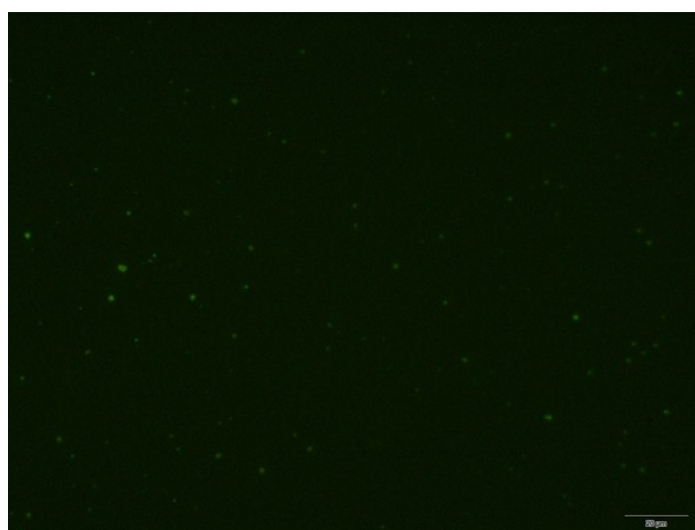

Fig. S1 FL images for CNDs.

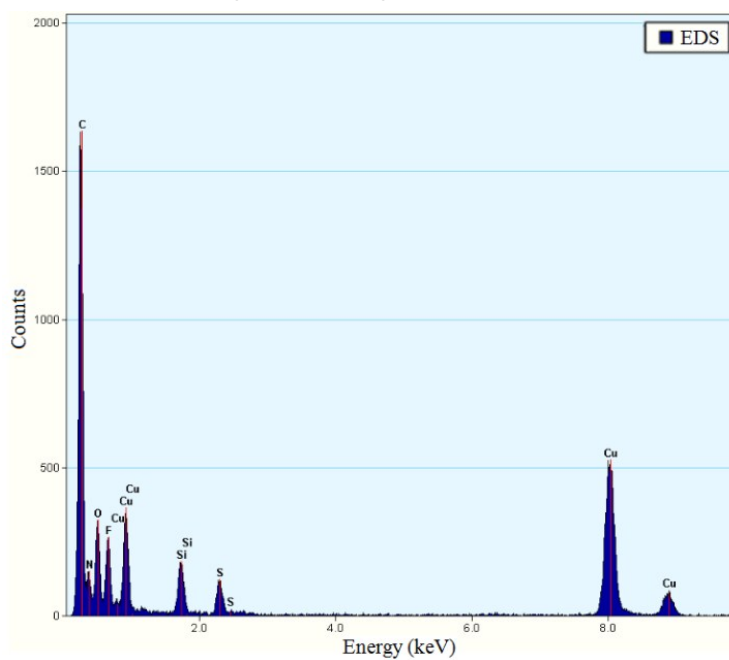

Fig. S2 EDS spectrum of CNDs thus formed.

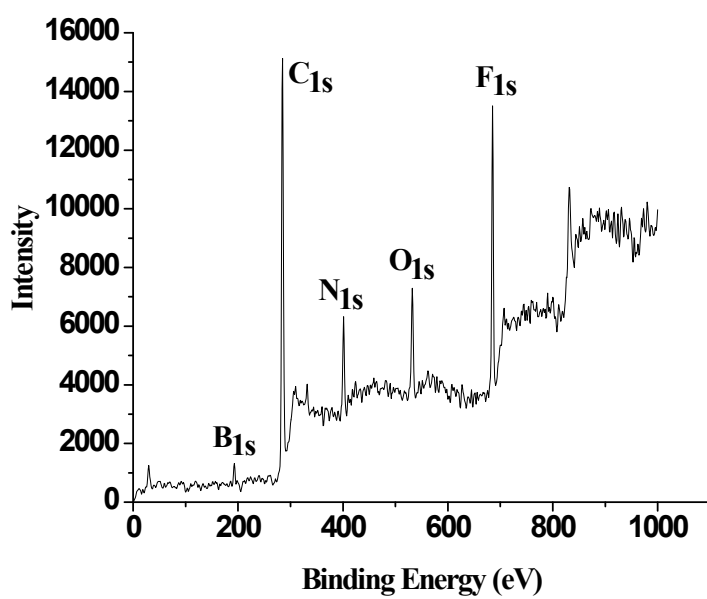

Fig. S3 XPS spectrum of CNDs thus formed.

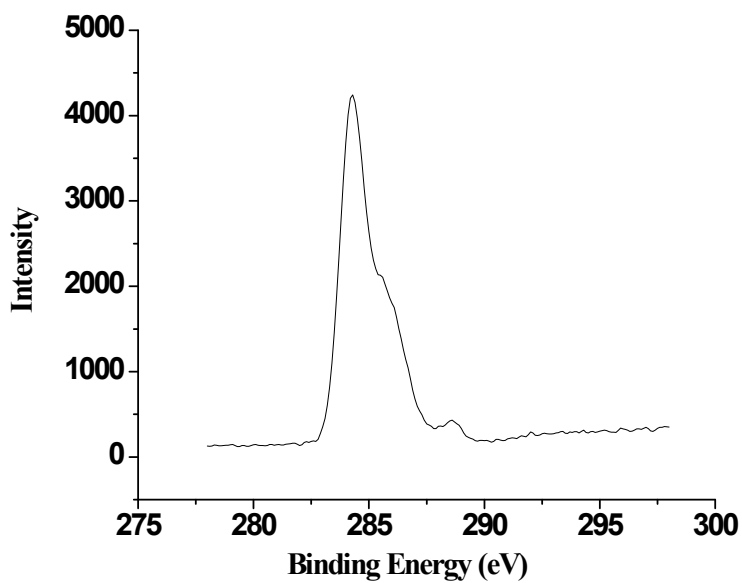

Fig. S4 C<sub>1s</sub> spectrum of CNDs thus formed.

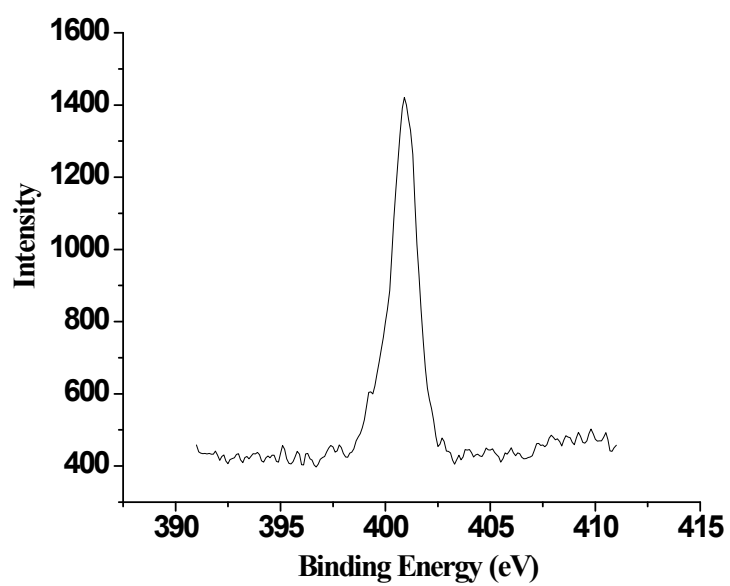

Fig. S5 N<sub>1s</sub> spectrum of CNDs thus formed.

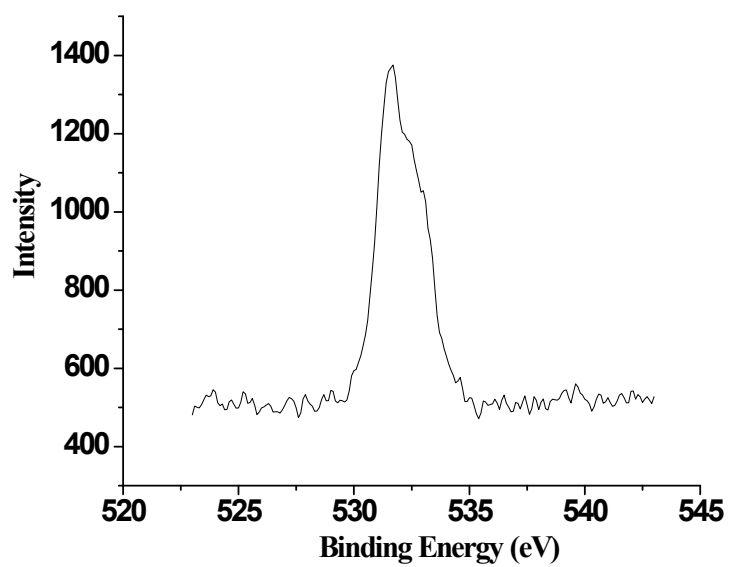

Fig. S6 O<sub>1s</sub> spectrum of CNDs thus formed.

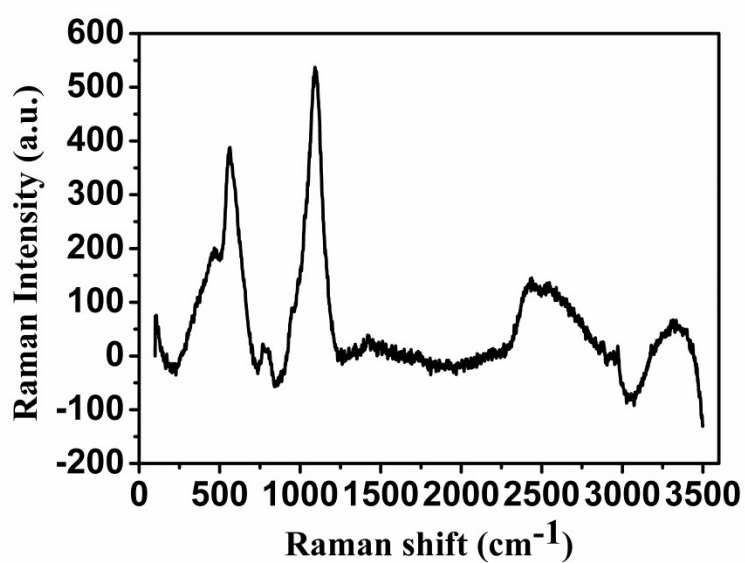

Fig. S7 Raman spectra of CNDs measured with 532 nm laser.

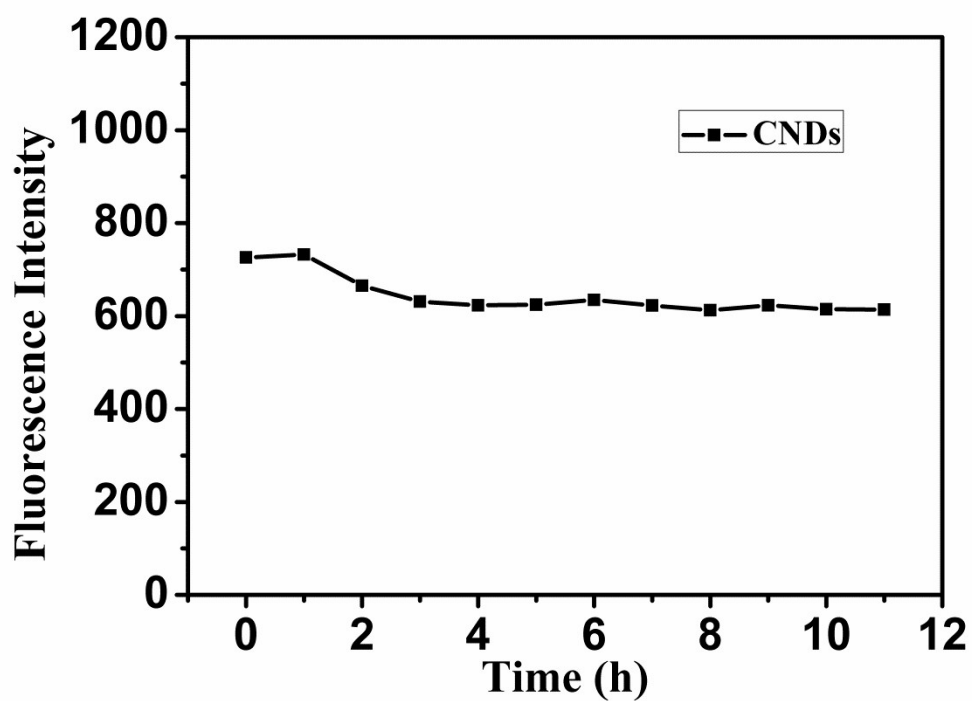

Fig. S8 Photostability test of the fluorescent CNDs in a fluorescence spectrophotometer with a 150 W Xe lamp under 365 nm excitation
